# Supplementary material
Source: PubMed Central journal article supplement (PMC3789232)
Supplement: NIHMS54714-supplement-Web_Appendix.pdf [file NIHMS54714-supplement-Web_Appendix.pdf]

# Normal ranges of heart rate and respiratory rate in children from birth to 18 years: a systematic review of observational studies

## Web Appendix

### Web Box 1: Existing reference ranges for respiratory rate and heart rate

#### Respiratory rate (breaths/minute)

| Age Range (years) | APLS <sup>1</sup> / PHPLS <sup>2</sup> | PALS <sup>3</sup> | EPLS <sup>4</sup> | PHTLS <sup>5</sup>   | ATLS <sup>6</sup> | WHO <sup>7</sup> |
|-------------------|----------------------------------------|-------------------|-------------------|----------------------|-------------------|------------------|
| Neonate           | 30 – 40                                | 30 – 60           | 30 – 40           | 30 – 50*             | <60               |                  |
| 0 – 1             | 30 – 40                                | 30 – 60           | 30 – 40           | 20 – 30*             | <60               | <50 <sup>†</sup> |
| 1 – 2             | 25 – 35                                | 24 – 40           | 26 – 34           | 20 – 30              | <40               | <40              |
| 2 – 3             | 25 – 30                                | 24 – 40           | 24 – 30           | 20 – 30              | <40               | <40              |
| 3 – 4             | 25 – 30                                | 24 – 40           | 24 – 30           | 20 – 30              | <35               | <40              |
| 4 – 5             | 25 – 30                                | 22 – 34           | 24 – 30           | 20 – 30              | <35               | <40              |
| 5 – 6             | 20 – 25                                | 22 – 34           | 20 – 24           | 20 – 30              | <35               |                  |
| 6 – 12            | 20 – 25                                | 18 – 30           | 20 – 24           | (12 – 20) – 30       | <30               |                  |
| 12 – 13           | 15 – 20                                | 18 – 30           | 12 – 20           | (12 – 20) – 30       | <30               |                  |
| 13 – 18           | 15 – 20                                | 12 – 16           | 12 – 20           | 12 – 20 <sup>^</sup> | <30               |                  |

\* PHTLS provides separate ranges for neonates up to six weeks, and for infants between seven weeks and one year of age.

<sup>^</sup> PHTLS does not provide ranges for adolescents over 16 years of age.

<sup>†</sup> WHO only provides ranges for children between two months and five years of age.

#### Heart rate (beats/minute)

| Age Range (years) | APLS <sup>1</sup> / PHPLS <sup>2</sup> | PALS <sup>3*</sup>     | EPLS <sup>4*</sup>     | PHTLS <sup>5</sup>     | ATLS <sup>6</sup> |
|-------------------|----------------------------------------|------------------------|------------------------|------------------------|-------------------|
| Neonate           | 110 – 160                              | 85 – 205 <sup>^</sup>  | 85 – 205 <sup>^</sup>  | 120 – 160 <sup>†</sup> | <160              |
| 0 – 1             | 110 – 160                              | 100 – 190 <sup>^</sup> | 100 – 180 <sup>^</sup> | 80 – 140 <sup>†</sup>  | <160              |
| 1 – 2             | 100 – 150                              | 100 – 190              | 100 – 180              | 80 – 130               | <150              |
| 2 – 3             | 95 – 140                               | 60 – 140               | 60 – 140               | 80 – 120               | <150              |
| 3 – 5             | 95 – 140                               | 60 – 140               | 60 – 140               | 80 – 120               | <140              |
| 5 – 6             | 80 – 120                               | 60 – 140               | 60 – 140               | 80 – 120               | <140              |
| 6 – 10            | 80 – 120                               | 60 – 140               | 60 – 140               | (60 – 80) – 100        | <120              |
| 10 – 12           | 80 – 120                               | 60 – 100               | 60 – 100               | (60 – 80) – 100        | <120              |
| 12 – 13           | 60 – 100                               | 60 – 100               | 60 – 100               | (60 – 80) – 100        | <100              |
| 13 – 18           | 60 – 100                               | 60 – 100               | 60 – 100               | 60 – 100 <sup>~</sup>  | <100              |

\* PALS and EPLS provide multiple ranges – ranges for awake children are tabulated

<sup>^</sup> PALS and EPLS provide separate ranges for infants up to three months, and for those between three months and two years of age.

<sup>†</sup> PHTLS provides separate ranges for infants up to six weeks, and for those between seven weeks and one year of age.

<sup>~</sup> PHTLS does not provide ranges for adolescents over 16 years of age.

**Web Table 1: Search strategy used to identify included studies**

| Database       | Age of subject                                                                                                                                                                                                        | Age variation                                                                                                                                                  | Breathing / heart rate                                                                                                                                                                                                                                                                                                                         | Reference values                                                                                                                                                                                                                                                                                                                         |
|----------------|-----------------------------------------------------------------------------------------------------------------------------------------------------------------------------------------------------------------------|----------------------------------------------------------------------------------------------------------------------------------------------------------------|------------------------------------------------------------------------------------------------------------------------------------------------------------------------------------------------------------------------------------------------------------------------------------------------------------------------------------------------|------------------------------------------------------------------------------------------------------------------------------------------------------------------------------------------------------------------------------------------------------------------------------------------------------------------------------------------|
| <b>MEDLINE</b> | adolescent/<br>child/<br>child, preschool/<br>infant/<br>infant, newborn/<br><br>(child* or adolescen* or infan*<br>or neonate* or teenage* or<br>newborn* or schoolchild* or<br>pediatric or paediatric).tw.         | Aging/<br>age distribution/<br>Age Factors/<br>Time Factors/<br><br>(age adj2 (related or<br>range* or specific or effect<br>or depend* or<br>distribut*)).tw. | respiration/<br>respiratory mechanics/<br>Respiratory Physiological<br>Phenomena/<br>Oximetry/<br>heart rate/<br>pulse/<br>Electrocardiography/<br><br>(heart rate* or pulse rate* or<br>cardiac rate*).tw.<br>(respirat* rate* or breathing<br>rate* or breathing<br>pattern*).tw.<br>pulse oximet*.tw.<br>(ecg or electrocardiogra*).tw.     | Reference Values/<br><br>(normal adj2 (rate* or<br>value* or limit* or<br>range* or variab*)).tw.<br>(reference adj2 (value*<br>or range* or limit* or<br>percentile or data)).tw.<br>((minim* or maxim* or<br>mean or median) adj2<br>(rate* or value* or<br>limit*)).tw.<br>normative data.tw.<br>threshold value*.tw.                 |
| <b>EMBASE</b>  | adolescent/<br>child/<br>preschool child/<br>school child/<br>infant/<br>newborn/<br><br>(child* or adolescen* or infan*<br>or neonate* or teenage* or<br>newborn* or schoolchild* or<br>pediatric or paediatric).tw. | Aging/<br>age distribution/<br>Age/<br>normal human/<br><br>(age* adj2 (related or<br>range* or specific or<br>effect* or depend* or<br>distribut*)).tw.       | Electrocardiogram/<br>breathing pattern/<br>breathing rate/<br>breathing/<br>heart rhythm/<br>pulse rate/<br>heart rate/<br>heart rate variability/<br><br>(heart rate* or pulse rate* or<br>cardiac rate*).tw.<br>(respirat* rate* or breathing<br>rate* or breathing<br>pattern*).tw.<br>pulse oximet*.tw.<br>(ecg or electrocardiogra*).tw. | reference value/<br>normal value/<br><br>(normal adj2 (rate* or<br>value* or limit* or<br>range* or variab*)).tw.<br>(reference adj2 (value*<br>or range* or limit* or<br>percentile or data)).tw.<br>((minim* or maxim* or<br>mean or median) adj2<br>(rate* or value* or<br>limit*)).tw.<br>normative data.tw.<br>threshold value*.tw. |
| <b>CINAHL</b>  | Adolescence/<br>Child/<br>Child, preschool<br>Infant/<br>Infant, newborn/<br><br>(child* or adolescen* or infan*<br>or neonate* or teenage* or<br>newborn* or schoolchild* or<br>pediatric or paediatric).tw.         | Aging/<br><br>(age* N2 (related or<br>range* or specific or<br>effect* or depend* or<br>distribut*)).tw.                                                       | Heart rate/<br>Heart rate variability/<br>Electrocardiography/<br>Respiration/<br>Respiratory Rate/<br>Pulse Oximetry/<br><br>(heart rate* or pulse rate* or<br>cardiac rate*).tw.<br>(respirat* rate* or breathing<br>rate* or breathing<br>pattern*).tw.<br>pulse oximet*.tw.<br>(ecg or electrocardiogra*).tw.                              |                                                                                                                                                                                                                                                                                                                                          |

To be included, a paper had to match at least one term in each category. The CINAHL search did not include terms in the reference values category.

## Web Annex 1: Kernel Regression

In our systematic review, we fitted curves showing the median and six representative centiles for the variation of heart rate and respiratory rate with respect to age. Each curve was fitted using a modified version of kernel regression, which will be discussed in more detail here.

Kernel regression is a non-parametric regression method, which allows a curve to be fitted to a set of data without specifying the form of the curve in advance.<sup>8</sup> To fit curves to the data on heart rate and respiratory rate in relation to age in children, it would be beneficial to have a regression method that could take into account both the different age ranges over which the measurements had been made, and would also allow weighting based on the sample size. No existing regression method was found that allowed for these variables, but it was possible to make simple alterations to the classical formulation of kernel regression to incorporate these changes.

In classical kernel regression, a kernel  $K(x)$  is centred on each data point,  $x = x_i$ . A popular choice for  $K(x)$  is the normal distribution with zero mean and unit variance, and this is what was used in this analysis. The kernel defines the spatial weighting given to the data point in the regression. Far away from the data point, the kernel function will have a small amplitude, and so the point will only make a small contribution to the regression curve, whereas it will make a large contribution in the region close to its location, where the value of the kernel function is larger. The width of the kernel function can be altered to control the smoothness of the final curve – this is controlled by the bandwidth  $h$ , and this can be incorporated into the definition of the kernel as shown in the equation below.

$$K_h(u) = \frac{1}{h} K\left(\frac{u}{h}\right)$$

Large values of the bandwidth will produce smooth curves, as each point will contribute to a large portion of the curve. Smaller values will produce more noisy curves, and are more likely to exhibit overfitting to the data, as each data point only affects a small portion of the curve, and does not share influence over a given section with many other points.

We use local polynomial kernel regression, which operates by fitting a polynomial at each point on the curve, weighted by the values of the kernels at that point. The degree of the polynomial fitted is denoted by  $p$ , so  $p=1$  would fit a straight line at each point. To calculate the value of the kernel regression,  $m$ , at point  $x$ , a polynomial of order  $p$  is fitted using weighted least squares. In this analysis, we use  $p=1$ , and so the explicit formula for the local linear estimator is used:

$$m = \frac{1}{n} \sum_{i=1}^n \frac{\{s_2(x; h) - s_1(x; h)(x_i - x)\} K_h(x_i - x) y_i}{s_2(x; h) s_0(x; h) - s_1(x; h)^2}$$

where  $n$  is the number of data points  $(x_i, y_i)$ , and  $s_r$  is defined by the equation below.

$$s_r = \frac{1}{n} \sum_{i=1}^n (x_i - x)^r K_h(x_i - x)$$

When fitting curves to the data on heart rate and respiratory rate in relation to age in children, each data point is associated with an age range, rather than a single age, as the measurements will have been made on groups of children. The size of the ranges can vary greatly, with some studies focusing on children grouped into year groups, while others may use 5-year groups, especially when considering older children.

One possible solution to this problem is to assign the data to the mid-point of the range, but this ignores the fact that it contains information about both older and younger children. It is therefore preferable to include the age range in the regression calculation, and this can be achieved using variable bandwidth kernel regression. In this formulation of kernel regression,  $h$  is replaced by  $h_i$ , so that the kernel centred on each data point is now able to have an independent bandwidth. The value of  $h_i$  at each data point is calculated using the following equation, where  $\Delta x_i$  is the age range associated with the data point, and  $h_c$  is a common multiplier which allows the overall smoothing of the curve to be manipulated.

$$h_i = h_c \Delta x_i$$

In addition to including variable bandwidths, it would also be useful to add weighting to data points to reflect the sample sizes of the measurements from which they are derived. This is achieved by adding a weighting term  $w_i$  to the kernel function, such that the resulting kernel function  $K_{h_i}$  is as shown below. The value of  $w_i$  for each data point is equal to the sample size for that point. This definition for the kernel function can then be used in place of  $K(h)$  in the local linear estimator equation.

$$K_{h_i}(u) = \frac{w_i}{h_i} K\left(\frac{u}{h_i}\right)$$

The choice of the common bandwidth multiplier,  $h_c$ , was made empirically, by trying a variety of values and choosing one that produced smooth curves with a good fit to the data across the full range of ages. For the heart rate, a value of  $h_c = 2.5$  was found to produce a good fit across all age ranges, for both the median and centile curves. For the respiratory rate data, a value of  $h_c = 1.5$  was found to produce the best fit. The choice of  $h_c$  is made empirically due to the inherent difficulty in defining an appropriate objective function for optimisation. This is because a balance needs to be struck between optimising for a close fit to the data, which will lead to a small value of  $h_c$ , and optimising for a smooth curve, which will produce a large value of  $h_c$ .

**Web Figure 1: Scatter plots of raw data extracted from studies reporting (a) respiratory rate and (b) heart rate in children.**

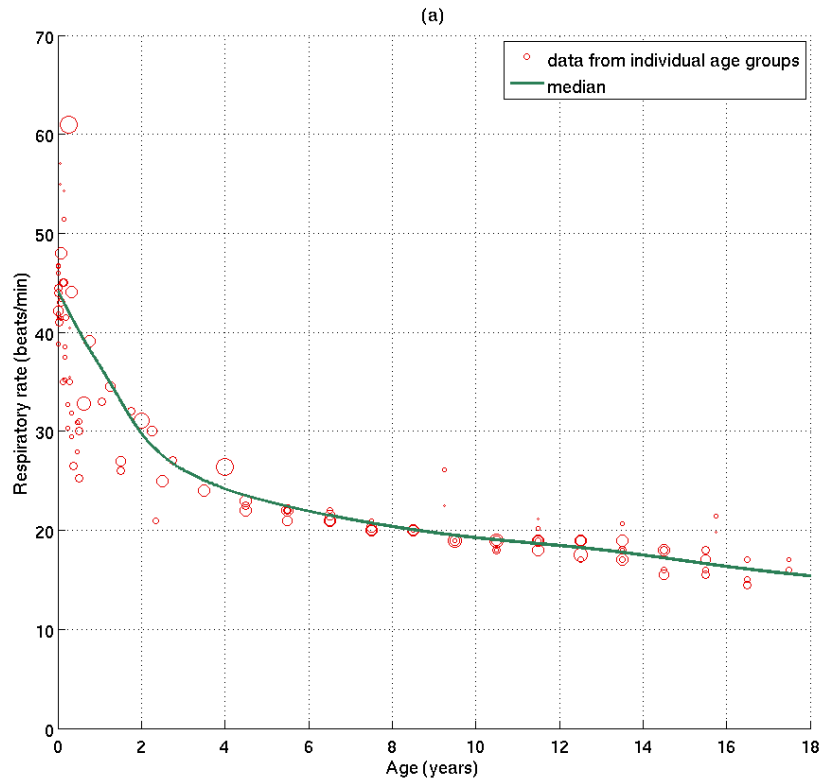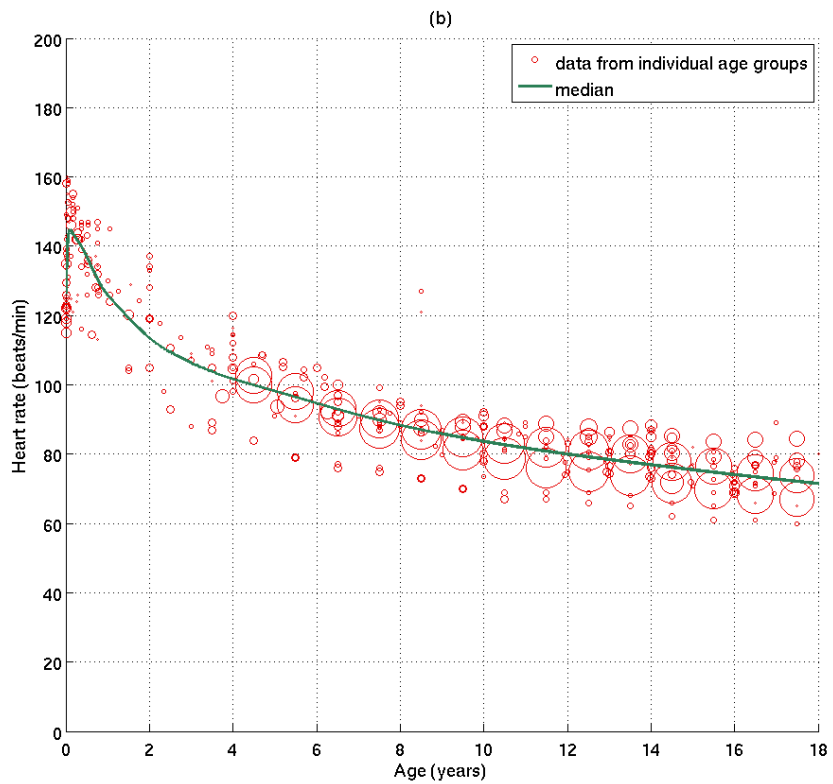

Note: Data is plotted at the mean age for the group of children. The size of the marker indicates the number of children in the group.

**Web Table 2: Summary of studies on respiratory rate included in the systematic review**

| Study, year                          | Setting                                                                    | Age Range | Sample Size | Study Description                                                                                                                                                                                                                                      | Method of respiratory rate measurement         |
|--------------------------------------|----------------------------------------------------------------------------|-----------|-------------|--------------------------------------------------------------------------------------------------------------------------------------------------------------------------------------------------------------------------------------------------------|------------------------------------------------|
| Illiff, 1952 <sup>9</sup>            | Research laboratory, USA                                                   | 0–18y     | 197         | Longitudinal study of heart rate, respiratory rate and body temperature in normal children                                                                                                                                                             | Manual (observation)                           |
| Ashton, 1971 <sup>10</sup>           | Research laboratory, UK                                                    | 44–144h   | 22          | Cross-sectional study of heart rate and respiratory rate during consecutive sleep cycles in infants                                                                                                                                                    | Strain gauge <sup>^</sup>                      |
| Hoppenbrouwers, 1979 <sup>11</sup>   | Sleep laboratory, USA                                                      | 0–6mths   | 25          | Longitudinal study of circadian patterns in the respiratory rate in neurologically normal infants                                                                                                                                                      | Expired CO2 monitor and thermistor             |
| Hoppenbrouwers, 1980 <sup>12</sup>   | Infant sleep laboratory, USA                                               | 0–6mths   | 25          | Longitudinal case-control study of circadian patterns in the respiratory rate in siblings of SIDS victims (only data from control group of non-SIDS infants included in review)                                                                        | Expired CO2 monitor and thermistor             |
| Curzi-Dascalova, 1981 <sup>13</sup>  | Hospital, Paris, France                                                    | 0–18wks   | 57          | Cross-sectional study of respiratory rate in normal, full-term infants recruited from hospital nurseries                                                                                                                                               | Strain gauges <sup>^</sup>                     |
| Curzi-Dascalova, 1983 <sup>14</sup>  | Hospital, Paris, France                                                    | 2d–18wks  | 38          | Case-control study of respiratory rate during sleep in siblings of SIDS victims (only data from control group of normal infants with no familial history of SIDS included in review)                                                                   | Strain gauge <sup>^</sup>                      |
| Ward, 1986a <sup>15</sup>            | Child's home, USA                                                          | 0–2y      | 64          | Case-control study of ventilatory patterns during sleep in infants with myelomeningocele (only data from control group of healthy infants included in review)                                                                                          | Chest wall impedance <sup>^</sup>              |
| Ward, 1986b <sup>16</sup>            | Medical centres, Los Angeles, USA                                          | 0–7mths   | 43          | Case-control study of ventilatory patterns during sleep in infants born to substance-abusing mothers (only data from control group of infants born to healthy mothers included in review)                                                              | Impedance pneumogram                           |
| Antila, 1990 <sup>17</sup>           | Unspecified                                                                | 2–65d     | 24          | Case-control study of heart rate variability in infants subsequently suffering SIDS (only data from control group of non-SIDS infants included in review)                                                                                              | Volume expansion capsule transducer            |
| Morley, 1990 <sup>18</sup>           | Child's home, Cambridge, UK                                                | 0–6mths   | 298         | Cross-sectional study of respiratory rate and severity of illness in children (only data from well children recruited randomly from the birth register included in this study)                                                                         | Manual (observation or auscultation)           |
| Poets, 1991 <sup>19</sup>            | Child's home, UK                                                           | 0–2y      | 42          | Longitudinal study of breathing patterns and heart rate in full-term, healthy infants selected at random                                                                                                                                               | Pressure capsule on chest                      |
| Nogues, 1992 <sup>20</sup>           | Research laboratory, France                                                | 60–75d    | 35          | Cross-sectional study of day-time and night-time respiratory rates in normal infants                                                                                                                                                                   | Rubber straps and thermistor <sup>^</sup>      |
| Kahn, 1993 <sup>21</sup>             | Paediatric Sleep Clinic, University Children's Hospital, Brussels, Belgium | 3mths     | 68          | Cross-sectional study of the relationship between body position and sleep characteristics in healthy subjects referred to paediatric sleep clinic following studies confirming normal sleep behaviour, and with no history of sleep problems or apnoea | Strain gauges and thermistor <sup>^</sup>      |
| Rusconi, 1994 <sup>22</sup>          | Day care centres or hospitals, Italy                                       | 0–3y      | 618         | Cross-sectional study of respiratory rate in children recruited from day care centres or hospital inpatient or outpatient departments, with no chronic or severe illness, or signs of respiratory infection                                            | Manual (auscultation)*                         |
| Bhandari, 1998 <sup>23</sup>         | Hospital, Chandigarh, India                                                | 1–8wks    | 50          | Longitudinal study of respiratory rate of healthy infants recruited at birth (only data from normal birthweight infants included in review)                                                                                                            | Manual (observation or auscultation)           |
| Montgomery-Downs, 1998 <sup>24</sup> | Community hospital and child's home, USA                                   | 0–6mths   | 88          | Longitudinal study of quiet sleep respiratory rates in full-term normal infants recruited during childbirth classes                                                                                                                                    | Capacitive pressure sensitive pad <sup>^</sup> |
| Rosenthal, 2000 <sup>25</sup>        | unspecified, London, UK                                                    | 8–17y     | 106         | Cross-sectional study of ventilatory variables in healthy children recruited from schools                                                                                                                                                              | Helium dilution mixed expired gas analysis*    |

|                                     |                                                 |         |       |                                                                                                                                                                                                                                      |                       |
|-------------------------------------|-------------------------------------------------|---------|-------|--------------------------------------------------------------------------------------------------------------------------------------------------------------------------------------------------------------------------------------|-----------------------|
| Wallis, 2005 <sup>26</sup>          | Schools, Plymouth, UK                           | 4–16y   | 1,109 | Cross-sectional study of heart rate and respiratory rate in children attending primary or secondary schools                                                                                                                          | Manual (observation)* |
| Balasubramanian, 2006 <sup>27</sup> | Children's Hospital, Chennai, India             | 1mth–5y | 626   | Cross-sectional study of heart rate, respiratory rate and oxygen saturation in healthy children attending outpatients department for immunization and/or well-baby check-ups as patients or siblings, or posted for elective surgery | Manual (observation)* |
| Wallis, 2006 <sup>28</sup>          | School, Langa Township, Cape Town, South Africa | 5–16y   | 346   | Cross-sectional study of heart rate and respiratory rate in children attending school                                                                                                                                                | Manual (observation)* |

**Notes:**

Age is given in years (y), months (mths), weeks (wks), days (d), or hours (h).

\* data from awake children was used in constructing the centile charts.

^ data from asleep children was used in constructing the centile charts.

Absence of the above markings indicates that it is not possible to differentiate between data from awake and asleep children.

SIDS - sudden infant death syndrome

CO<sub>2</sub> - carbon dioxide

**Web Table 3: Summary of studies on heart rate included in the systematic review**

| Study, year                   | Setting                                        | Age Range | Sample Size | Study Description                                                                                                                                                                                                    | Method of heart rate measurement    |
|-------------------------------|------------------------------------------------|-----------|-------------|----------------------------------------------------------------------------------------------------------------------------------------------------------------------------------------------------------------------|-------------------------------------|
| Illif, 1952 <sup>9</sup>      | Research laboratory, USA                       | 0–18y     | 197         | Longitudinal study of heart rate, respiratory rate and body temperature in normal children                                                                                                                           | Manual (palpation or auscultation)  |
| Ashton, 1971 <sup>10</sup>    | Research laboratory, UK                        | 44–144h   | 22          | Cross-sectional study of heart rate and respiratory rate during consecutive sleep cycles in infants                                                                                                                  | ECG <sup>^</sup>                    |
| Bradfield, 1971 <sup>29</sup> | Primary School, Cambridge, UK                  | 7–10y     | 54          | Cross-sectional study of body build, heart rate and energy expenditure of boys attending primary school                                                                                                              | Electrode-based heart rate monitor* |
| Betau, 1980 <sup>30</sup>     | Veterans General Hospital, Taiwan              | 0–1y      | 302         | Longitudinal study of ECG parameters from randomly chosen normal newborns in hospital nursery                                                                                                                        | ECG                                 |
| Davignon, 1980 <sup>31</sup>  | unspecified, Montreal, Canada                  | 0–16y     | 2,141       | Cross-sectional study of normal ECG parameters from healthy white children recruited from obstetric clinic, well-child clinics, and public schools                                                                   | ECG                                 |
| De Caprio, 1981 <sup>32</sup> | unspecified, Italy                             | 5–25y     | 46          | Cross-sectional study of the effect of age on heart rate and systolic time interval in healthy young people recruited during normal check-ups                                                                        | ECG                                 |
| Hediger, 1984 <sup>33</sup>   | unspecified, Philadelphia, USA                 | 12–17y    | 621         | Longitudinal study of blood pressure in black adolescents, recruited from a large birth cohort study                                                                                                                 | Manual (radial palpation)*          |
| Pereira, 1984 <sup>34</sup>   | Home visits, Philadelphia, USA                 | 18–19mths | 21          | Cross-sectional study of the relationship between heart rate, activity, and energy expenditure in healthy male infants recruited from a large longitudinal study                                                     | ECG*                                |
| Lindner, 1985 <sup>35</sup>   | unspecified, Germany                           | 0–4wks    | 30          | Longitudinal study to determine the influence of heart rate on systolic time intervals in healthy term neonates                                                                                                      | ECG and echocardiogram              |
| Ward, 1986a <sup>15</sup>     | Child's home, USA                              | 0–2y      | 64          | Case-control study of ventilatory patterns during sleep in infants with myelomeningocele (only data from control group of healthy infants included in review)                                                        | ECG <sup>^</sup>                    |
| Ward, 1986b <sup>16</sup>     | Medical centres, Los Angeles, USA              | 0–7mths   | 43          | Case-control study of ventilatory patterns during sleep in infants born to substance-abusing mothers (only data from control group of infants born to healthy mothers included in review)                            | ECG                                 |
| Egger, 1987 <sup>36</sup>     | Outpatient clinic or child's home, Switzerland | 10–16y    | 43          | Cross-sectional study of the normal range of 24-hour ambulatory blood pressure in healthy children recruited from schools                                                                                            | Blood pressure monitor*             |
| Palatini, 1987 <sup>37</sup>  | Normal daily activities, Italy                 | 10–14y    | 30          | Case-control study of the effect of endurance training on Q-T interval and cardiac electrical stability (only data from control group of healthy normotensive boys randomly selected from school included in review) | ECG                                 |
| Berard, 1988 <sup>38</sup>    | Day nurseries, Nice, France                    | 6–45mths  | 264         | Cross-sectional study of blood pressure and heart rate in normal children measured during routine check-ups                                                                                                          | Blood pressure monitor*             |
| Peirano, 1988 <sup>39</sup>   | Child's home, France                           | 5 – 24wks | 28          | Case-control study of night sleep heart rate patterns in infants at risk for SIDS (only data from control group of clinically and neurologically normal infants included in review)                                  | ECG <sup>^</sup>                    |
| Romano, 1988 <sup>40</sup>    | Normal daily activities, Italy                 | 6–11y     | 32          | Cross-sectional study of ECG parameters in healthy children recruited as volunteers or after requesting examination prior to undertaking sporting activity                                                           | ECG                                 |
| Gemelli, 1989 <sup>41</sup>   | Hospital nursery, Italy                        | 4d        | 21          | Cross-sectional study of circadian blood pressure patterns in full-term infants delivered after spontaneous labour                                                                                                   | Blood pressure monitor              |
| Mimura, 1989 <sup>42</sup>    | Private kindergarten, Japan                    | 4–6y      | 1,069       | Cross-sectional study of physical fitness in young children recruited from a kindergarten                                                                                                                            | Pen-oscillograph*                   |



|                                 |                                                                                               |        |         |                                                                                                                                                                                                                                                        |                                               |
|---------------------------------|-----------------------------------------------------------------------------------------------|--------|---------|--------------------------------------------------------------------------------------------------------------------------------------------------------------------------------------------------------------------------------------------------------|-----------------------------------------------|
| Muller, 1989 <sup>43</sup>      | Medical centres, France                                                                       | 4–18y  | 101,259 | Cross-sectional study of ECG parameters in children                                                                                                                                                                                                    | ECG*                                          |
| Park, 1989a <sup>44</sup>       | Medical Center Hospital, San Antonio, USA                                                     | 5–149h | 219     | Cross-sectional study of arm and calf blood pressure in healthy full-term infants recruited at birth                                                                                                                                                   | Blood pressure monitor                        |
| Park, 1989b <sup>45</sup>       | Pediatricians' offices and well-baby clinics, San Antonio, USA                                | 0–5y   | 1,554   | Cross-sectional study of oscillometric blood pressure in patients and accompanying siblings attending paediatricians' offices or well-baby clinics, who were completely healthy or had only minor complaints without fever                             | Blood pressure monitor                        |
| Von Bernuth, 1989 <sup>46</sup> | Normal daily activities, Germany                                                              | 0–14y  | 141     | Cross-sectional study of heart rate and rhythm in healthy children                                                                                                                                                                                     | ECG                                           |
| Antila, 1990 <sup>9</sup>       | unspecified                                                                                   | 2–65d  | 24      | Case-control study of heart rate variability in infants subsequently suffering SIDS (only data from control group of non-SIDs infants included in review)                                                                                              | ECG                                           |
| Gemelli, 1990 <sup>47</sup>     | unspecified, Italy                                                                            | 0–1y   | 514     | Longitudinal study of blood pressure during the 1st year of life in infants born consecutively at the Policlinic of the University of Messina                                                                                                          | Blood pressure monitor*                       |
| Poets, 1991 <sup>19</sup>       | Child's home, UK                                                                              | 0–2y   | 42      | Longitudinal study of breathing patterns and heart rate in full-term, healthy infants selected at random                                                                                                                                               | ECG                                           |
| Durant, 1992 <sup>48</sup>      | Normal daily activities, USA                                                                  | 3–5y   | 190     | Cross-sectional study of reliability and variability of heart rate monitoring in young children. Participants recruited from longitudinal study into cardiovascular disease risk factors in families of young children                                 | Electrode-based telemetry heart rate monitor* |
| Alpay, 1993 <sup>49</sup>       | Military Academy of Medicine, Ankara, Turkey                                                  | 3–10d  | 25      | Cross-sectional study of heart rate and rhythm patterns in healthy newborn infants                                                                                                                                                                     | ECG                                           |
| Barron, 1993 <sup>50</sup>      | Clinical neurophysiology laboratory, Haifa, Israel                                            | 15–17y | 40      | Case-control study of neurocardiovascular function in young people who had episodes of syncope under conditions of emotional stress (only data from control group of healthy volunteers included in review)                                            | ECG*                                          |
| Kahn, 1993 <sup>21</sup>        | Paediatric Sleep Clinic, University Children's Hospital, Brussels, Belgium                    | 3mths  | 68      | Cross-sectional study of the relationship between body position and sleep characteristics in healthy subjects referred to paediatric sleep clinic following studies confirming normal sleep behaviour, and with no history of sleep problems or apnoea | ECG^                                          |
| Krull, 1993 <sup>51</sup>       | Normal daily activities, Germany                                                              | 6–10y  | 105     | Cross-sectional study of 24-hour ambulatory blood pressure monitoring in healthy children recruited from a school                                                                                                                                      | Blood pressure monitor*                       |
| Harshfield, 1994 <sup>52</sup>  | Normal daily activities, USA                                                                  | 10–18y | 300     | Cross-sectional study of ambulatory blood pressure monitoring in healthy, normotensive children recruited by advertisement for a study on cardiovascular risk factors in youth                                                                         | Blood pressure monitor*                       |
| Macfarlane, 1994 <sup>53</sup>  | General and children's hospital, postnatal clinics, preschools and schools, Glasgow, Scotland | 0–18y  | 1,782   | Cross-sectional study of ECG parameters in healthy, normally developed children, and children hospitalised for problems that did not affect the cardiovascular system                                                                                  | ECG                                           |
| Regecová, 1995 <sup>54</sup>    | Kindergartens, Bratislava, Slovak Republic                                                    | 3–7y   | 1,542   | Cross-sectional study of the association between urban traffic noise and blood pressure in healthy children recruited from kindergartens                                                                                                               | Manual (radial palpation)*                    |
| Andrášyová, 1996 <sup>55</sup>  | Gynaecological Clinic of university faculty of medicine, Bratislava, Slovak Republic          | 1–7d   | 83      | Cross-sectional study of the pattern of circulatory response to head-up body tilting in full-term newborns                                                                                                                                             | Blood pressure monitor*                       |

|                                     |                                                                                             |         |       |                                                                                                                                                                                                                                         |                               |
|-------------------------------------|---------------------------------------------------------------------------------------------|---------|-------|-----------------------------------------------------------------------------------------------------------------------------------------------------------------------------------------------------------------------------------------|-------------------------------|
| Abdurrahman, 1998 <sup>56</sup>     | Children's Hospital Medical Centre, Cincinnati, USA                                         | 1wk–24y | 43    | Cross-sectional study of pulmonary venous flow Doppler velocities in normal children referred for echocardiographic evaluation of murmur, in normal sinus rhythm, and with no evidence of structural or functional heart disease        | Echocardiogram                |
| Compagnone, 1999 <sup>57</sup>      | Elementary schools, San Francisco, USA                                                      | 7–10y   | 174   | Cross-sectional study of cardiovascular reactivity in elementary school children                                                                                                                                                        | Blood pressure monitor*       |
| Oberlander, 1999 <sup>58</sup>      | Biobehavioural Research Unit, Centre for Community Child Health Research, Vancouver, Canada | 4–8mths | 24    | Longitudinal study of cardiac autonomic responses to acute noxious events in healthy infants recruited at birth                                                                                                                         | ECG*                          |
| Rogachevskaia, 1999 <sup>59</sup>   | Secondary school, Siktivkar, Russia                                                         | 7–16y   | 726   | Cross-sectional study of blood circulation and gas exchange in secondary school children                                                                                                                                                | Manual (radial palpation)*    |
| Logan, 2000 <sup>60</sup>           | Daytime monitoring during normal daily activities, Scotland                                 | 3–4y    | 20    | Cross-sectional study of apparent levels of physical activity in young healthy children                                                                                                                                                 | Telemetry heart rate monitor* |
| Rijnbeek, 2001 <sup>61</sup>        | unspecified, Rotterdam, the Netherlands                                                     | 0–16y   | 1,912 | Cross-sectional study of normal ECG parameters in healthy children recruited from child health centres, primary and secondary schools                                                                                                   | ECG                           |
| Rabbia, 2002 <sup>62</sup>          | Schools, Turin, Italy                                                                       | 12–18y  | 2,230 | Cross-sectional study of resting heart rate in randomly selected children recruited from schools                                                                                                                                        | Manual (radial palpation)*    |
| Bernaards, 2003 <sup>63</sup>       | unspecified, the Netherlands                                                                | 13y     | 410   | Longitudinal study to assess the association between smoking and cardiovascular fitness in subjects recruited from secondary schools. Smoking prevalence at age 13 was approximately 1%                                                 | ECG*                          |
| Rekawek, 2003 <sup>64</sup>         | Normal daily activities, Poland                                                             | 4–18y   | 372   | Cross-sectional study of heart rate variability indices in healthy children                                                                                                                                                             | ECG                           |
| Hadtstein, 2004 <sup>65</sup>       | Normal daily activities, Germany                                                            | 5–18y   | 938   | Cross-sectional study of physiological circadian and ultradian rhythms of blood pressure and heart rate in healthy school children                                                                                                      | Blood pressure monitor*       |
| Pivik, 2004 <sup>66</sup>           | Research laboratory, USA                                                                    | 8–10y   | 39    | Case-control study of the cardiovascular response to morning nutrition (only data from non-fasting group of healthy children recruited from local community included in review)                                                         | ECG*                          |
| Makan, 2005 <sup>67</sup>           | unspecified, UK                                                                             | 14–18y  | 250   | Case-control study of left ventricular volume in trained adolescent athletes (only data from control group of healthy adolescents recruited from large secondary education boarding schools included in review)                         | Echocardiogram*               |
| Massin, 2005 <sup>68</sup>          | Normal daily activities, Belgium                                                            | 0–16y   | 264   | Case-control study of cardiac rate and rhythm patterns in ambulatory and hospitalised patients (only data from control group of healthy ambulatory children included in review)                                                         | ECG                           |
| Wallis, 2005 <sup>26</sup>          | Schools, Plymouth, UK                                                                       | 4–16y   | 1,109 | Cross-sectional study of heart rate and respiratory rate in children attending primary or secondary schools                                                                                                                             | Finger probe*                 |
| Balasubramanian, 2006 <sup>27</sup> | Children's Hospital, Chennai, India                                                         | 1mth–5y | 626   | Cross-sectional study of heart rate, respiratory rate and oxygen saturation in healthy children attending outpatients department for immunization and/or well-baby check-ups as patients or siblings, or scheduled for elective surgery | Manual (auscultation)*        |
| Cui, 2006 <sup>69</sup>             | Children's Hospital, Illinois, USA                                                          | 0–18y   | 289   | Cross-sectional study to determine the normal range of left ventricular Tei index in paediatric patients with normal echocardiograms                                                                                                    | Echocardiogram                |

|                              |                                                                 |        |        |                                                                                                                                                                                                                                                                                                                                                                 |                         |
|------------------------------|-----------------------------------------------------------------|--------|--------|-----------------------------------------------------------------------------------------------------------------------------------------------------------------------------------------------------------------------------------------------------------------------------------------------------------------------------------------------------------------|-------------------------|
| Niboshi, 2006 <sup>70</sup>  | unspecified, Japan                                              | 9–18y  | 970    | Cross-sectional study of brachial-ankle pulse wave velocity in healthy Japanese children recruited from school or after doctor's consultations for functional murmur (patients and healthy siblings)                                                                                                                                                            | ECG*                    |
| Wallis, 2006 <sup>28</sup>   | School, Langa Township, Cape Town, South Africa                 | 5–16y  | 346    | Cross-sectional study of heart rate and respiratory rate in children attending school                                                                                                                                                                                                                                                                           | Finger probe*           |
| Yamanaka, 2006 <sup>71</sup> | Hospital, company or school, Japan                              | 6–19y  | 279    | Cross-sectional study of the effects of aging on the cardiovascular response to postural change in healthy Japanese subjects                                                                                                                                                                                                                                    | ECG*                    |
| Mason, 2007 <sup>72</sup>    | unspecified, worldwide                                          | 10–19y | 1,345  | Cross-sectional study of ECG parameters in normal healthy volunteers screened for enrolment in pharmaceutical company-sponsored clinical trials                                                                                                                                                                                                                 | ECG                     |
| Roberson, 2007 <sup>73</sup> | Children's Hospital, Illinois, USA                              | 0–18y  | 308    | Cross-sectional study of right ventricular Tei index in paediatric patients with normal echocardiograms                                                                                                                                                                                                                                                         | Echocardiogram          |
| Wyller, 2007 <sup>74</sup>   | Outpatient clinic, Hospital paediatric department, Oslo, Norway | 12–18y | 57     | Case-control study of abnormal thermoregulatory responses in chronic fatigue syndrome (only data from control group of healthy volunteers from local schools included in review)                                                                                                                                                                                | ECG*                    |
| Salameh, 2008 <sup>75</sup>  | Normal activity, unspecified location                           | 0–20y  | 616    | Cross-sectional study of normal heart rate in healthy children referred with palpitations or suspected paroxysmal supraventricular tachycardia, in whom a full clinical and echocardiographic examination failed to confirm the suspected problem, and did not find any evidence of structural cardiac disease, significant arrhythmia or other serious illness | ECG                     |
| Semizel, 2008 <sup>76</sup>  | unspecified, Bursa, Turkey                                      | 0–16y  | 2,241  | Cross-sectional study of ECG parameters in healthy children recruited from nursery, primary and secondary schools, child health centres, and a maternity hospital                                                                                                                                                                                               | ECG                     |
| Sung, 2008 <sup>77</sup>     | Schools, Hong Kong                                              | 6–18y  | 14,842 | Cross-sectional study of blood pressure in Chinese children recruited from primary and secondary schools                                                                                                                                                                                                                                                        | Blood pressure monitor* |

**Notes:**

Age is given in years (y), months (mths), weeks (wks), days (d), or hours (h).

\* data from awake children was used in constructing the centile charts.

^ data from asleep children was used in constructing the centile charts.

Absence of the above markings indicates that it is not possible to differentiate between data from awake and asleep children.

SIDS - sudden infant death syndrome

ECG - electrocardiograph

**Web Table 4: Proposed respiratory rate cut-offs (breaths/minute) based on centile charts**

| Age Range | 1st centile | 10th centile | 25th centile | Median | 75th centile | 90th centile | 99th centile |
|-----------|-------------|--------------|--------------|--------|--------------|--------------|--------------|
| 0 – 3m    | 25          | 34           | 40           | 43     | 52           | 57           | 66           |
| 3 – 6m    | 24          | 33           | 38           | 41     | 49           | 55           | 64           |
| 6 – 9m    | 23          | 31           | 36           | 39     | 47           | 52           | 61           |
| 9 – 12m   | 22          | 30           | 35           | 37     | 45           | 50           | 58           |
| 12 – 18m  | 21          | 28           | 32           | 35     | 42           | 46           | 53           |
| 18 – 24m  | 19          | 25           | 29           | 31     | 36           | 40           | 46           |
| 2 – 3y    | 18          | 22           | 25           | 28     | 31           | 34           | 38           |
| 3 – 4y    | 17          | 21           | 23           | 25     | 27           | 29           | 33           |
| 4 – 6y    | 17          | 20           | 21           | 23     | 25           | 27           | 29           |
| 6 – 8y    | 16          | 18           | 20           | 21     | 23           | 24           | 27           |
| 8 – 12y   | 14          | 16           | 18           | 19     | 21           | 22           | 25           |
| 12 – 15y  | 12          | 15           | 16           | 18     | 19           | 21           | 23           |
| 15 – 18y  | 11          | 13           | 15           | 16     | 18           | 19           | 22           |

Age ranges given in years (y) and months (m).

**Web Table 5: Proposed heart rate cut-offs (beats/minute) based on centile charts**

| Age Range | 1st centile | 10th centile | 25th centile | Median | 75th centile | 90th centile | 99th centile |
|-----------|-------------|--------------|--------------|--------|--------------|--------------|--------------|
| Birth     | 90          | 107          | 116          | 127    | 138          | 148          | 164          |
| 0 – 3m    | 107         | 123          | 133          | 143    | 154          | 164          | 181          |
| 3 – 6m    | 104         | 120          | 129          | 140    | 150          | 159          | 175          |
| 6 – 9m    | 98          | 114          | 123          | 134    | 143          | 152          | 168          |
| 9 – 12m   | 93          | 109          | 118          | 128    | 137          | 145          | 161          |
| 12 – 18m  | 88          | 103          | 112          | 123    | 132          | 140          | 156          |
| 18 – 24m  | 82          | 98           | 106          | 116    | 126          | 135          | 149          |
| 2 – 3y    | 76          | 92           | 100          | 110    | 119          | 128          | 142          |
| 3 – 4y    | 70          | 86           | 94           | 104    | 113          | 123          | 136          |
| 4 – 6y    | 65          | 81           | 89           | 98     | 108          | 117          | 131          |
| 6 – 8y    | 59          | 74           | 82           | 91     | 101          | 111          | 123          |
| 8 – 12y   | 52          | 67           | 75           | 84     | 93           | 103          | 115          |
| 12 – 15y  | 47          | 62           | 69           | 78     | 87           | 96           | 108          |
| 15 – 18y  | 43          | 58           | 65           | 73     | 83           | 92           | 104          |

Age ranges given in years (y) and months (m).  
 “Birth” refers to the immediate neonatal period.

## **Web Annex 2: Investigation of heterogeneity**

Heart rates measured in community settings were significantly higher than those measured in clinical or laboratory settings. This may be because many of the studies carried out in community settings involved ambulatory monitoring during normal daily activities, which might include physical exertion, although exercise studies were excluded from the review. In contrast, children studied in more controlled clinical and research settings are more likely to be resting during measurement, resulting in lower heart rates.

We also found that heart rates were significantly higher when measured using automated devices (e.g. ECGs) compared to manual measurements (e.g. auscultation or palpation). Electronic devices may cause anxiety in children, resulting in elevation of heart rate, particularly if they are uncomfortable (as might be the case with inflating blood pressure cuffs) or unfamiliar. On the other hand, manual methods may underestimate true heart rates owing to difficulty in counting the rapid rates seen in young children. This has previously been reported to account for underestimation of the heart rate by between 15 and 20 beats/minute in young infants.<sup>78</sup> Heart rates measured in developing countries were found to be significantly higher than those measured in developed countries. This may be due to lower levels of general health in developing countries even among “healthy children”, although a similar increase was not observed in the respiratory rate.

A small but significant trend in heart rate was observed with the date of publication, with more recent publications tending to report higher heart rates. However, it is likely that much of this variation is due to the higher prevalence in recently published papers of automated measurement methods, and measurements made in community settings or developing countries, all of which were shown to be associated with higher reported heart rates. Although our search spans the period from 1950 to 2009, over 75% of the included studies were carried out after 1988, with only 6% being carried out before 1980. Heterogeneity due to gender was not investigated, although some studies report a small but significant difference in heart rate of between 3 and 11 beats/minute at some age ranges.<sup>42,52,61,62,75</sup> The age ranges at which these differences are significant are not consistent between studies, and so further investigation may be required on this subject.

The increase in heart rate in the first month of life observed in our centile chart is unlikely to be due to modelling artefact, as a similar peak is observed in all six primary studies that reported multiple measurements on infants under one year of age.<sup>30,31,35,47,53,76</sup> All of these studies used automated measuring equipment, with five using ECG, and one using an automated blood pressure monitor,<sup>47</sup> making measurement error unlikely.

## Web References

- 1 Advanced Life Support Group. Advanced Paediatric Life Support: The Practical Approach. 4<sup>th</sup> ed. WileyBlackwell; 2004.
- 2 Advanced Life Support Group. Pre-hospital paediatric life support : a practical approach to the out-of-hospital emergency care of children. 2<sup>nd</sup> ed. Blackwell; 2005.
- 3 American Heart Association. Pediatric Advanced Life Support Provider Manual. American Heart Association; 2006.
- 4 Biarent D, Resuscitation Council (UK), European Resuscitation Council. European paediatric life support course. 2<sup>nd</sup> ed. Resuscitation Council (UK); 2006.
- 5 National Association of Emergency Medical Technicians Pre-Hospital Trauma Life Support Committee, American College of Surgeons Committee on Trauma. PHTLS : basic and advanced prehospital trauma life support. 5<sup>th</sup> ed. Mosby; 2003.
- 6 American College of Surgeons. ATLS: Advanced Trauma Life Support for Doctors. 7<sup>th</sup> ed. American College of Surgeons; 2004.
- 7 Wardlaw TM, Johansson EW, Hodge M, World Health Organization, UNICEF. Pneumonia: the forgotten killer of children. World Health Organization; 2006.
- 8 Wand MP, Jones MC. Kernel Smoothing. Chapman and Hill; 1995.
- 9 Iliff A, Lee VA. Pulse rate, respiratory rate, and body temperature of children between two months and eighteen years of age. *Child Dev* 1952; 23(4): 237–45.
- 10 Ashton R, Connolly K. The relation of respiration rate and heart rate to sleep states in the human newborn. *Dev Med Child Neurol* 1971; 13(2): 180–7.
- 11 Hoppenbrouwers T, Jensen D, Hodgman J, Harper R, Sterman M. Respiration during the first six months of life in normal infants: II. The emergence of a circadian pattern. *Neuropädiatrie* 1979; 10(3): 264–80.
- 12 Hoppenbrouwers T, Jensen DK, Hodgman JE, Harper RM, Sterman MB. The emergence of a circadian pattern in respiratory rates: comparison between control infants and subsequent siblings of SIDS. *Pediatr Res* 1980; 14(4 Pt 1): 345–51.
- 13 Curzi-Dascalova L, Gaudebout C, Dreyfus-Brisac C. Respiratory frequencies of sleeping infants during the first months of life: correlations between values in different sleep states. *Early Hum Dev* 1981; 5(1): 39–54.
- 14 Curzi-Dascalova L, Flores-Guevara R, Guidasci S, Korn G, Monod N. Respiratory frequency during sleep in siblings of sudden infant death syndrome victims. A comparison with control, normal infants. *Early Hum Dev* 1983; 8(3-4): 235–41.
- 15 Ward SL, Jacobs RA, Gates EP, Hart LD, Keens TG. Abnormal ventilatory patterns during sleep in infants with myelomeningocele. *J Pediatr* 1986; 109(4): 631–4.
- 16 Ward SL, Schuetz S, Kirshna V, et al. Abnormal sleeping ventilatory pattern in infants of substance-abusing mothers. *American Journal of Diseases of Children* 1986; 140(10): 1015–20.
- 17 Antila KJ, Välimäki IA, Mäkelä M, Tuominen J, Wilson AJ, Southall DP. Heart rate variability in infants subsequently suffering sudden infant death syndrome (SIDS). *Early Hum Dev* 1990; 22(2): 57–72.
- 18 Morley CJ, Thornton AJ, Fowler MA, Cole TJ, Hewson PH. Respiratory rate and severity of illness in babies under 6 months old. *Arch Dis Child* 1990; 65(8): 834–7.
- 19 Poets CF, Stebbens VA, Alexander JR, Southall DP. Breathing patterns and heart rates at ages 6 weeks and 2 years. *American Journal of Diseases of Children* 1991; 145(12): 1393–6.
- 20 Nogues B, Vecchierini-Blineau MF, Louvet S. Variations de la fréquence respiratoire au cours du sommeil de jour et de nuit chez 35 nourrissons normaux ages de 2 mois. *Neurophysiol Clin* 1992; 22(2): 167–77.

- 21 Kahn A, Groswasser J, Sottiaux M, Rebuffat E, Franco P, Dramaix M. Prone or supine body position and sleep characteristics in infants. *Pediatrics* 1993; 91(6): 1112–5.
- 22 Rusconi F, Castagneto M, Gagliardi L, et al. Reference values for respiratory rate in the first 3 years of life. *Pediatrics* 1994; 94(3): 350–5.
- 23 Bhandari A, Singhi S, Bhalla AK, Narang A. Respiratory rates of Indian infants under 2 months of age. *Ann Trop Paediatr* 1998; 18(4): 329–34.
- 24 Montgomery-Downs H, Thoman EB. Biological and behavioral correlates of quiet sleep respiration rates in infants. *Physiol Behav* 1998; 64(5): 637–43.
- 25 Rosenthal M, Bush A. Ventilatory variables in normal children during rest and exercise. *Eur Respir J* 2000; 16(6): 1075–83.
- 26 Wallis LA, Healy M, Undy MB, Maconochie I. Age related reference ranges for respiration rate and heart rate from 4 to 16 years. *Arch Dis Child* 2005; 90(11): 1117–21.
- 27 Balasubramanian S, Suresh N, Ravichandran C, Dinesh CG. Reference values for oxygen saturation by pulse oximetry in healthy children at sea level in Chennai. *Annals of Tropical Paediatrics: International Child Health* 2006; 26(2): 95–9.
- 28 Wallis LA, Maconochie I. Age related reference ranges of respiratory rate and heart rate for children in South Africa. *Arch Dis Child* 2006; 91(4): 330–3.
- 29 Bradfield RB, Chan H, Bradfield NE, Payne PR. Energy expenditures and heart rates of Cambridge boys at school. *Am J Clin Nutr* 1971; 24(12): 1461–6.
- 30 Betau H, Tzee-Chung W, Meng L. An electrocardiographic study of chinese infants. *Chung Hua Min Kuo Hsiao Erh Ko I Hsueh Hui Tsa Chih* 1980; 21(4): 247–55.
- 31 Davignon A, Rautaharju P, Boisselle E, Soumis F, Mègélas M, Choquette A. Normal ECG standards for infants and children. *Pediatr Cardiol* 1980; 1(2): 123–31.
- 32 De Caprio L, Romano M, Giunta A, et al. Effeti dell’eta’ sulla frequenza cardiac e gli intervallici di tempo sistolici in bambini, adolescent e giovani adulti. *G Ital Cardiol* 1981; 11(6): 724–7.
- 33 Hediger ML, Schall JI, Katz SH, Gruskin AB, Eveleth PB. Resting blood pressure and pulse rate distributions in black adolescents: The Philadelphia Blood Pressure Project. *Pediatrics* 1984; 74(6): 1016–21.
- 34 Pereira GR, Johnston FE, McKinney S, et al. Heart rate and sleep time: their relationship with growth and adiposity in male infants. *JPGN* 1984; 3(5): 759–64.
- 35 Lindner W, Döhlemann C, Schneider K, Versmold H. Heart rate and systolic time intervals in healthy newborn infants: longitudinal study. *Pediatr Cardiol* 1985; 6(3): 117–21.
- 36 Egger M, Bianchetti MG, Gnädinger M, Kobelt R, Oetliker O. Twenty four hour intermittent, ambulatory blood pressure monitoring. *Arch Dis Child* 1987; 62(11): 1130–5.
- 37 Palatini P, Maraglino G, Mos L, et al. Effect of endurance training on Q-T interval and cardiac electrical stability in boys aged 10 to 14. Ventricular arrhythmias in trained boys. *Cardiology* 1987; 74(5): 400–7.
- 38 Berard E, Boutte P, Macone F, Albertini M, Mariani R. Pression artérielle chez l’enfant entre 6 et 45 mois. *Archives Francaises de Pediatrie* 1988; 45(3): 157–61.
- 39 Peirano P, Lacombe J, Kastler B, Guillon G, Vicente G, Monod N. Night sleep heart rate patterns recorded by cardiopneumography at home in normal and at-risk for SIDS infants. *Early Hum Dev* 1988; 17(2-3): 175–86.
- 40 Romano M, Clarizia M, Onofrio E, et al. Heart rate, PR, and QT intervals in normal children: a 24-hour Holter monitoring study. *Clin Cardiol* 1988; 11(12): 839–42.
- 41 Gemelli M, Manganaro R, Mami C, Rando F, De Luca F. Circadian blood pressure pattern in full-term newborn infants. *Biology Neonate* 1989; 56(6): 315–23.
- 42 Mimura K, Maeda K. Heart rate response to treadmill exercise in children of ages 4-6 years. *Annals of Physiological Anthropology* 1989; 8(3): 143–50.
- 43 Muller L, Monneau JP, Gueguen R. Description des données électrocardiographiques chez

- l'enfant et l'adolescent: a propos de plus de 100 000 ECG. *Ann Cardiol Angeiol (Paris)* 1989; 38(2): 75-81.
- 44 Park MK, Lee DH. Normative arm and calf blood pressure values in the newborn. *Pediatrics* 1989; 83(2): 240-3.
- 45 Park MK, Menard SM. Normative oscillometric blood pressure values in the first 5 years in an office setting. *American Journal of Diseases of Children* 1989; 143(7): 860-4.
- 46 von Bernuth G, Toussaint R, Mund C, Rabe P, Timbul K. Herzfrequenz und hertzrhythmus bei gesunden Säuglingen und Kindern. *Klin Padiatr* 1989; 201(2): 98-103.
- 47 Gemelli M, Manganaro R, Mamì C, De Luca F. Longitudinal study of blood pressure during the 1st year of life. *European Journal of Pediatrics* 1990; 149(5): 318-20.
- 48 Durant RH, Baranowski T, Davis H, et al. Reliability and variability of heart rate monitoring in 3-, 4-, or 5-yr-old children. *Med Sci Sports Exerc* 1992; 24(2): 265-71.
- 49 Alpay F, Celiker A, Lenk MK, Ozcan O, Tanindi S, İşik E. Ambulatory electrocardiographic monitoring in healthy newborn infants. *Turk J Pediatr* 1993; 35(3): 163-70.
- 50 Barron SA, Rogovski Z, Hemli Y. Vagal cardiovascular reflexes in young persons with syncope. *Ann Intern Med* 1993; 118(12): 943-6.
- 51 Krull F, Buck T, Offner G, Brodehl J. Twenty-four hour blood pressure monitoring in healthy children. *European Journal of Pediatrics* 1993; 152(7): 555-8.
- 52 Harshfield GA, Alpert BS, Pulliam DA, Somes GW, Wilson DK. Ambulatory blood pressure recordings in children and adolescents. *Pediatrics* 1994; 94(2 Pt 1): 180-4.
- 53 Macfarlane PW, McLaughlin SC, Devine B, Yang TF. Effects of age, sex, and race on ECG interval measurements. *J Electrocardiol* 1994; 27 Suppl: 14-9.
- 54 Regecová V, Kellerová E. Effects of urban noise pollution on blood pressure and heart rate in preschool children. *J Hypertens* 1995; 13(4): 405-12.
- 55 Andrásyová D, Kellerová E. Blood pressure and heart rate response to head-up position in full-term newborns. *Early Hum Dev* 1996; 44(3): 169-78.
- 56 Abdurrahman L, Hoit BD, Banerjee A, Khoury PR, Meyer RA. Pulmonary venous flow Doppler velocities in children. *J Am Soc Echocardiogr* 1998; 11(2): 132-7.
- 57 Compagnone PD, Strayer FF. Modes of cardiovascular regulation during middle childhood. *J Dev Behav Pediatr* 1999; 20(3): 137-44.
- 58 Oberlander TF, Grunau RE, Pitfield S, Whitfield MF, Saul JP. The developmental character of cardiac autonomic responses to an acute noxious event in 4- and 8-month-old healthy infants. *Pediatr Res* 1999; 45(4 Pt 1): 519-25.
- 59 Rogachevskaia OV, Evdokimov VG. [The cardiovascular system function of schoolchildren in the European North]. *Gig Sanit* 1999; 5: 36-40.
- 60 Logan N, Reilly JJ, Grant S, Paton JY. Resting heart rate definition and its effect on apparent levels of physical activity in young children. *Med Sci Sports Exerc* 2000; 32(1): 162-6.
- 61 Rijnbeek PR, Witsenburg M, Schrama E, Hess J, Kors JA. New normal limits for the paediatric electrocardiogram. *Eur Heart J* 2001; 22(8): 702-11.
- 62 Rabbia F, Grosso T, Cat Genova G, Conterno A, De Vito B, Mulatero P, et al. Assessing resting heart rate in adolescents: determinants and correlates. *J Hum Hypertens* 2002; 16(5): 327-32.
- 63 Bernaards CM, Twisk JW, Van Mechelen W, Snel J, Kemper HC. A longitudinal study on smoking in relationship to fitness and heart rate response. *Med Sci Sports Exerc* 2003; 35(5): 793-800.
- 64 Rekawek J, Miszczak-Knecht M, Kawalec W, Mielniczuk J. Heart rate variability in healthy children. *Folia Cardiologica* 2003; 10(2): 203-11.
- 65 Hadtstein C, Wühl E, Soergel M, Witte K, Schaefer F. Normative values for circadian and ultradian cardiovascular rhythms in childhood. *Hypertension* 2004; 43(3): 547-54.
- 66 Pivik RT, Dykman RA. Cardiovascular effects of morning nutrition in preadolescents. *Physiol*



*Behav* 2004; 82(2-3): 295–302.

- 67 Makan J, Sharma S, Firoozi S, Whyte G, Jackson PG, McKenna WJ. Physiological upper limits of ventricular cavity size in highly trained adolescent athletes. *Heart* 2005; 91(4): 495–9.
- 68 Massin MM, Bourguignon A, Gérard P. Study of cardiac rate and rhythm patterns in ambulatory and hospitalized children. *Cardiology* 2005; 103(4): 174–9.
- 69 Cui W, Roberson DA. Left ventricular Tei index in children: comparison of tissue Doppler imaging, pulsed wave Doppler, and M-mode echocardiography normal values. *J Am Soc Echocardiogr* 2006; 19(12): 1438–45.
- 70 Niboshi A, Hamaoka K, Sakata K, et al. Characteristics of brachialankle pulse wave velocity in Japanese children. *Eur J Pediatr* 2006; 165(9): 625–9.
- 71 Yamanaka Y, Honma K. Cardiovascular autonomic nervous response to postural change in 610 healthy Japanese subjects in relation to age. *Autonomic Neuroscience* 2006; 124(1-2): 125–31.
- 72 Mason J, Ramseth D, Chanter D, Moon T, Goodman D, Mendzelevski B. Electrocardiographic reference ranges derived from 79,743 ambulatory subjects. *J Electrocardiol* 2007; 40(3): 228-34.e8.
- 73 Roberson DA, Cui W. Right ventricular Tei index in children: effect of method, age, body surface area, and heart rate. *J Am Soc Echocardiogr* 2007; 20(6): 764–70.
- 74 Wyller VB, Godang K, Morkrid L, Saul JP, Thaulow E, Walloe L. Abnormal thermoregulatory responses in adolescents with chronic fatigue syndrome: relation to clinical symptoms. *Pediatrics* 2007; 120(1): e129–37.
- 75 Salameh A, Gebauer RA, Grollmuss O, Vít P, Reich O, Janousek J. Normal limits for heart rate as established using 24-hour ambulatory electrocardiography in children and adolescents. *Cardiology in the Young* 2008; 18(5): 467–72.
- 76 Semizel E, Öztürk B, Bostan OM, Cil E, Ediz B. The effect of age and gender on the electrocardiogram in children. *Cardiology in the Young* 2008; 18(1): 26-40.
- 77 Sung RY, Choi KC, So HK, et al. Oscillometrically measured blood pressure in Hong Kong Chinese children and associations with anthropometric parameters. *J Hypertens* 2008; 26(4): 678-84.
- 78 Kamlin CO, O'Donnell CP, Everest NJ, Davis PG, Morley CJ. Accuracy of clinical assessment of infant heart rate in the delivery room. *Resuscitation* 2006; 71(3): 319–21.
